# Supplementary material for: High entropy alloy mediated growth of graphene
Source: Royal Society of Chemistry journal article supplement (doi:10.1039/c4ce00227j), 2014-01-01
Supplement: c4ce00227j1.pdf [file c4ce00227j1.pdf]

## Supporting Information

### High entropy alloy mediated growth of graphene

*Yih-Farn Kao<sup>+</sup>, Chia-I Hung<sup>+</sup>, Shih-Hsin Chang, Jien-Wei Yeh, and Wen-Kuang Hsu\**

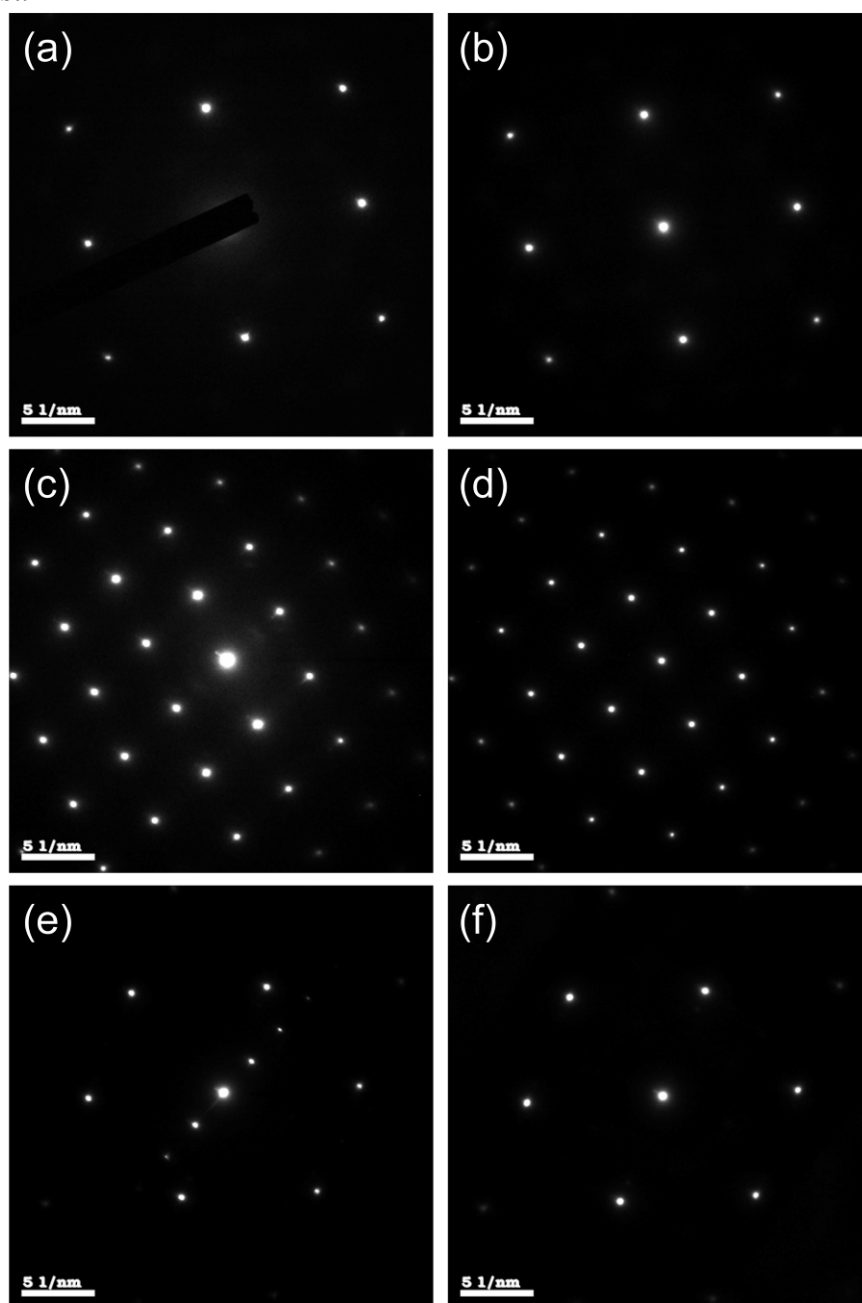

**Figure S1.** In-situ electron diffraction (ED) patterns. (a), (c), and (e) obtained from  $G_{0.5}/S_{0.5}$ ,  $G_{1.0}/S_{1.0}$ , and  $G_{1.5}/S_{1.5}$  interfaces while (b), (d), and (e) captured from  $S_{0.5}$ ,  $S_{1.0}$ , and  $S_{1.5}$  substrates.
